# Supplementary material for: Stereoretentive Pd-catalysed Stille cross-coupling reactions of secondary alkyl azastannatranes and aryl halides
Source: Springer Nature journal article supplement (doi:10.1038/nchem.1652), 2013-05-17
Supplement: 41557_2013_BFnchem1652_MOESM59_ESM.cif [file 41557_2013_BFnchem1652_MOESM59_ESM.cif]

 
data_compound 11 
 
_audit_creation_method            SHELXL-97 
_chemical_name_systematic 
; 
 ? 
; 
_chemical_name_common             ? 
_chemical_melting_point           ? 
_chemical_formula_moiety          
 'C18 H15 Br N2 O, 0.6(H2 O)' 
_chemical_formula_sum 
 'C18 H16.19 Br N2 O1.60' 
_chemical_formula_weight          365.96 
_chemical_absolute_configuration    rmad
 
loop_ 
 _atom_type_symbol 
 _atom_type_description 
 _atom_type_scat_dispersion_real 
 _atom_type_scat_dispersion_imag 
 _atom_type_scat_source 
 'C'  'C'   0.0033   0.0016 
 'International Tables Vol C Tables 4.2.6.8 and 6.1.1.4' 
 'H'  'H'   0.0000   0.0000 
 'International Tables Vol C Tables 4.2.6.8 and 6.1.1.4' 
 'N'  'N'   0.0061   0.0033 
 'International Tables Vol C Tables 4.2.6.8 and 6.1.1.4' 
 'O'  'O'   0.0106   0.0060 
 'International Tables Vol C Tables 4.2.6.8 and 6.1.1.4' 
 'Br'  'Br'  -0.2901   2.4595 
 'International Tables Vol C Tables 4.2.6.8 and 6.1.1.4' 
 
_symmetry_cell_setting           'Monoclinic'
_symmetry_space_group_name_H-M   'P 21'
 
loop_ 
 _symmetry_equiv_pos_as_xyz 
 'x, y, z' 
 '-x, y+1/2, -z' 
 
_cell_length_a                    7.4574(4) 
_cell_length_b                    5.6600(3) 
_cell_length_c                    19.1444(11) 
_cell_angle_alpha                 90.00 
_cell_angle_beta                  97.2820(10) 
_cell_angle_gamma                 90.00 
_cell_volume                      801.55(8) 
_cell_formula_units_Z             2 
_cell_measurement_temperature     100(2) 
_cell_measurement_reflns_used    6881
_cell_measurement_theta_min        2.75
_cell_measurement_theta_max       28.29
 
_exptl_crystal_description       'slab-like'
_exptl_crystal_colour            'colorless'
_exptl_crystal_size_max           0.54 
_exptl_crystal_size_mid           0.20 
_exptl_crystal_size_min           0.05 
_exptl_crystal_density_meas       ? 
_exptl_crystal_density_diffrn     1.516 
_exptl_crystal_density_method     'not measured' 
_exptl_crystal_F_000              372 
_exptl_absorpt_coefficient_mu     2.572 
_exptl_absorpt_correction_type    multi-scan 
_exptl_absorpt_correction_T_min   0.3372 
_exptl_absorpt_correction_T_max   0.8822 
_exptl_absorpt_process_details    SADABS 
 
_exptl_special_details 
; 
 ? 
; 
 
_diffrn_ambient_temperature       100(2) 
_diffrn_radiation_wavelength      0.71073 
_diffrn_radiation_type            MoK\a 
_diffrn_radiation_source          'fine-focus sealed tube' 
_diffrn_radiation_monochromator   graphite 
_diffrn_measurement_device_type  'Bruker APEX-II CCD'
_diffrn_measurement_method       '\w scans'
_diffrn_detector_area_resol_mean  ? 
_diffrn_reflns_number             12458 
_diffrn_reflns_av_R_equivalents   0.0284 
_diffrn_reflns_av_sigmaI/netI     0.0294 
_diffrn_reflns_limit_h_min        -9 
_diffrn_reflns_limit_h_max        9 
_diffrn_reflns_limit_k_min        -7 
_diffrn_reflns_limit_k_max        7 
_diffrn_reflns_limit_l_min        -25 
_diffrn_reflns_limit_l_max        25 
_diffrn_reflns_theta_min          2.14 
_diffrn_reflns_theta_max          28.32 
_reflns_number_total              3999 
_reflns_number_gt                 3758 
_reflns_threshold_expression      >2sigma(I) 
 
_computing_data_collection      'Bruker APEX2'
_computing_cell_refinement      'Bruker SAINT'
_computing_data_reduction       'Bruker SAINT' 
_computing_structure_solution   'SHELXS-97 (Sheldrick, 2008)'
_computing_structure_refinement 'SHELXL-97 (Sheldrick, 2008)'
_computing_molecular_graphics   'Bruker SHELXTL'
_computing_publication_material 'Bruker SHELXTL'
 
_refine_special_details 
; 
 Refinement of F^2^ against ALL reflections.  The weighted R-factor wR and 
 goodness of fit S are based on F^2^, conventional R-factors R are based 
 on F, with F set to zero for negative F^2^. The threshold expression of 
 F^2^ > 2sigma(F^2^) is used only for calculating R-factors(gt) etc. and is 
 not relevant to the choice of reflections for refinement.  R-factors based 
 on F^2^ are statistically about twice as large as those based on F, and R- 
 factors based on ALL data will be even larger. 
; 
 
_refine_ls_structure_factor_coef  Fsqd  
_refine_ls_matrix_type            full 
_refine_ls_weighting_scheme       calc  
_refine_ls_weighting_details 
 'calc w=1/[\s^2^(Fo^2^)+(0.0281P)^2^+0.1445P] where P=(Fo^2^+2Fc^2^)/3' 
_atom_sites_solution_primary      direct 
_atom_sites_solution_secondary    difmap 
_atom_sites_solution_hydrogens    geom 
_refine_ls_hydrogen_treatment     mixed 
_refine_ls_extinction_method      none 
_refine_ls_extinction_coef        ? 
_refine_ls_abs_structure_details 
 'Flack H D (1983), Acta Cryst. A39, 876-881' 
_refine_ls_abs_structure_Flack    -0.009(6) 
# It is 1.009(6) form the refinement of the inverted structure. 
_refine_ls_number_reflns          3999 
_refine_ls_number_parameters      215 
_refine_ls_number_restraints      4 
_refine_ls_R_factor_all           0.0265 
_refine_ls_R_factor_gt            0.0236 
_refine_ls_wR_factor_ref          0.0564 
_refine_ls_wR_factor_gt           0.0553 
_refine_ls_goodness_of_fit_ref    1.048 
_refine_ls_restrained_S_all       1.047 
_refine_ls_shift/su_max           0.000 
_refine_ls_shift/su_mean          0.000 
 
loop_ 
 _atom_site_label 
 _atom_site_type_symbol 
 _atom_site_fract_x 
 _atom_site_fract_y 
 _atom_site_fract_z 
 _atom_site_U_iso_or_equiv 
 _atom_site_adp_type 
 _atom_site_occupancy 
 _atom_site_symmetry_multiplicity 
 _atom_site_calc_flag 
 _atom_site_refinement_flags 
 _atom_site_disorder_assembly 
 _atom_site_disorder_group 
Br1 Br 0.62550(2) 0.74919(4) -0.105958(8) 0.02655(6) Uani 1 1 d . . . 
O1 O 0.87278(19) 1.2199(3) 0.22152(7) 0.0255(3) Uani 1 1 d . . . 
N1 N 1.0532(2) 0.8988(3) 0.23355(8) 0.0207(3) Uani 1 1 d . . . 
N2 N 0.5556(2) 0.8006(3) 0.55744(9) 0.0247(4) Uani 1 1 d . . . 
C1 C 1.1244(3) 0.9634(4) 0.30634(9) 0.0222(4) Uani 1 1 d . . . 
H1 H 1.1689 1.1302 0.3076 0.027 Uiso 1 1 calc R . . 
C2 C 1.2855(3) 0.7941(5) 0.32345(10) 0.0327(6) Uani 1 1 d . . . 
H2A H 1.3843 0.8706 0.3548 0.039 Uiso 1 1 calc R . . 
H2B H 1.2483 0.6483 0.3463 0.039 Uiso 1 1 calc R . . 
C3 C 1.3449(3) 0.7390(7) 0.25131(9) 0.0380(5) Uani 1 1 d . . . 
H3A H 1.4190 0.8686 0.2353 0.046 Uiso 1 1 calc R . . 
H3B H 1.4142 0.5896 0.2524 0.046 Uiso 1 1 calc R . . 
C4 C 1.1646(3) 0.7175(5) 0.20465(10) 0.0283(5) Uani 1 1 d . . . 
H4A H 1.1779 0.7505 0.1548 0.034 Uiso 1 1 calc R . . 
H4B H 1.1118 0.5581 0.2082 0.034 Uiso 1 1 calc R . . 
C5 C 0.9297(3) 1.0377(3) 0.19651(10) 0.0194(4) Uani 1 1 d . . . 
C6 C 0.8596(2) 0.9604(3) 0.12321(10) 0.0171(3) Uani 1 1 d . . . 
C7 C 0.7764(2) 0.7423(5) 0.11001(8) 0.0223(3) Uani 1 1 d . . . 
H7 H 0.7689 0.6344 0.1475 0.027 Uiso 1 1 calc R . . 
C8 C 0.7041(3) 0.6824(3) 0.04169(11) 0.0224(4) Uani 1 1 d . . . 
H8 H 0.6442 0.5354 0.0326 0.027 Uiso 1 1 calc R . . 
C9 C 0.7199(2) 0.8373(3) -0.01259(10) 0.0196(4) Uani 1 1 d . . . 
C10 C 0.8030(3) 1.0554(3) -0.00054(10) 0.0208(4) Uani 1 1 d . . . 
H10 H 0.8128 1.1610 -0.0384 0.025 Uiso 1 1 calc R . . 
C11 C 0.8718(2) 1.1166(3) 0.06789(9) 0.0187(4) Uani 1 1 d . . . 
H11 H 0.9276 1.2663 0.0770 0.022 Uiso 1 1 calc R . . 
C12 C 0.9848(2) 0.9363(3) 0.35634(9) 0.0187(4) Uani 1 1 d . . . 
C13 C 0.8763(2) 0.7345(5) 0.35412(8) 0.0216(3) Uani 1 1 d . . . 
H13 H 0.8831 0.6197 0.3184 0.026 Uiso 1 1 calc R . . 
C14 C 0.7583(2) 0.7008(3) 0.40395(10) 0.0209(4) Uani 1 1 d . . . 
H14 H 0.6839 0.5642 0.4022 0.025 Uiso 1 1 calc R . . 
C15 C 0.7501(2) 0.8699(3) 0.45662(10) 0.0188(4) Uani 1 1 d . . . 
C16 C 0.8545(3) 1.0752(3) 0.45834(10) 0.0200(4) Uani 1 1 d . . . 
H16 H 0.8465 1.1914 0.4936 0.024 Uiso 1 1 calc R . . 
C17 C 0.9704(3) 1.1065(3) 0.40755(9) 0.0195(4) Uani 1 1 d . . . 
H17 H 1.0407 1.2466 0.4079 0.023 Uiso 1 1 calc R . . 
C18 C 0.6373(3) 0.8308(3) 0.51162(10) 0.0203(4) Uani 1 1 d . . . 
O2 O 0.5498(3) 0.2443(8) 0.28600(12) 0.0385(8) Uani 0.596(5) 1 d PD . . 
H2C H 0.559(5) 0.195(9) 0.3271(11) 0.058 Uiso 0.596(5) 1 d PD . . 
H2D H 0.654(2) 0.254(14) 0.276(2) 0.058 Uiso 0.596(5) 1 d PD . . 
 
loop_ 
 _atom_site_aniso_label 
 _atom_site_aniso_U_11 
 _atom_site_aniso_U_22 
 _atom_site_aniso_U_33 
 _atom_site_aniso_U_23 
 _atom_site_aniso_U_13 
 _atom_site_aniso_U_12 
Br1 0.02748(9) 0.02953(9) 0.02125(9) -0.00707(10) -0.00235(6) 0.00049(11) 
O1 0.0344(7) 0.0201(8) 0.0220(6) -0.0006(6) 0.0031(5) 0.0022(7) 
N1 0.0232(8) 0.0242(8) 0.0149(8) 0.0013(6) 0.0027(6) 0.0006(7) 
N2 0.0235(8) 0.0253(10) 0.0257(8) -0.0023(6) 0.0053(6) -0.0004(6) 
C1 0.0216(9) 0.0310(11) 0.0138(9) 0.0004(7) 0.0014(7) -0.0029(8) 
C2 0.0229(9) 0.0551(18) 0.0194(9) 0.0036(10) 0.0002(7) 0.0086(10) 
C3 0.0242(9) 0.0672(15) 0.0230(9) -0.0011(16) 0.0041(7) 0.0107(17) 
C4 0.0280(9) 0.0357(14) 0.0209(8) -0.0006(9) 0.0021(7) 0.0094(10) 
C5 0.0209(9) 0.0211(9) 0.0164(9) 0.0040(7) 0.0029(7) -0.0046(7) 
C6 0.0163(8) 0.0178(8) 0.0170(8) 0.0014(7) 0.0014(7) 0.0007(7) 
C7 0.0247(8) 0.0195(8) 0.0223(8) 0.0036(12) 0.0020(6) -0.0028(12) 
C8 0.0198(9) 0.0164(9) 0.0303(10) -0.0001(7) 0.0009(8) -0.0027(6) 
C9 0.0175(9) 0.0228(8) 0.0181(9) -0.0044(7) 0.0015(7) 0.0025(7) 
C10 0.0241(10) 0.0201(9) 0.0186(9) 0.0031(7) 0.0038(7) -0.0018(7) 
C11 0.0205(9) 0.0177(9) 0.0182(9) 0.0010(7) 0.0033(7) -0.0016(7) 
C12 0.0196(9) 0.0210(9) 0.0149(8) 0.0029(7) -0.0008(7) 0.0014(7) 
C13 0.0254(8) 0.0207(8) 0.0184(7) 0.0004(10) 0.0022(6) -0.0024(10) 
C14 0.0219(8) 0.0187(11) 0.0216(8) 0.0012(7) 0.0007(7) -0.0026(6) 
C15 0.0163(9) 0.0212(9) 0.0187(9) 0.0022(7) 0.0015(7) 0.0019(7) 
C16 0.0207(9) 0.0200(9) 0.0190(9) -0.0022(7) 0.0008(7) 0.0008(7) 
C17 0.0205(9) 0.0181(9) 0.0188(9) 0.0015(7) -0.0015(7) -0.0018(7) 
C18 0.0184(9) 0.0201(8) 0.0223(9) -0.0020(7) 0.0019(7) 0.0016(7) 
O2 0.0319(13) 0.0493(16) 0.0348(13) 0.004(2) 0.0058(10) 0.006(2) 
 
_geom_special_details 
; 
 All esds (except the esd in the dihedral angle between two l.s. planes) 
 are estimated using the full covariance matrix.  The cell esds are taken 
 into account individually in the estimation of esds in distances, angles 
 and torsion angles; correlations between esds in cell parameters are only 
 used when they are defined by crystal symmetry.  An approximate (isotropic) 
 treatment of cell esds is used for estimating esds involving l.s. planes. 
; 
 
loop_ 
 _geom_bond_atom_site_label_1 
 _geom_bond_atom_site_label_2 
 _geom_bond_distance 
 _geom_bond_site_symmetry_2 
 _geom_bond_publ_flag 
Br1 C9 1.9027(19) . ? 
O1 C5 1.235(3) . ? 
N1 C5 1.343(3) . ? 
N1 C4 1.471(3) . ? 
N1 C1 1.473(2) . ? 
N2 C18 1.142(2) . ? 
C1 C12 1.508(3) . ? 
C1 C2 1.539(3) . ? 
C1 H1 1.0000 . ? 
C2 C3 1.535(3) . ? 
C2 H2A 0.9900 . ? 
C2 H2B 0.9900 . ? 
C3 C4 1.522(3) . ? 
C3 H3A 0.9900 . ? 
C3 H3B 0.9900 . ? 
C4 H4A 0.9900 . ? 
C4 H4B 0.9900 . ? 
C5 C6 1.499(3) . ? 
C6 C7 1.391(3) . ? 
C6 C11 1.391(3) . ? 
C7 C8 1.392(3) . ? 
C7 H7 0.9500 . ? 
C8 C9 1.376(3) . ? 
C8 H8 0.9500 . ? 
C9 C10 1.388(3) . ? 
C10 C11 1.389(3) . ? 
C10 H10 0.9500 . ? 
C11 H11 0.9500 . ? 
C12 C17 1.389(3) . ? 
C12 C13 1.397(3) . ? 
C13 C14 1.391(2) . ? 
C13 H13 0.9500 . ? 
C14 C15 1.397(3) . ? 
C14 H14 0.9500 . ? 
C15 C16 1.397(3) . ? 
C15 C18 1.446(3) . ? 
C16 C17 1.392(3) . ? 
C16 H16 0.9500 . ? 
C17 H17 0.9500 . ? 
O2 H2C 0.829(10) . ? 
O2 H2D 0.825(10) . ? 
 
loop_ 
 _geom_angle_atom_site_label_1 
 _geom_angle_atom_site_label_2 
 _geom_angle_atom_site_label_3 
 _geom_angle 
 _geom_angle_site_symmetry_1 
 _geom_angle_site_symmetry_3 
 _geom_angle_publ_flag 
C5 N1 C4 126.28(16) . . ? 
C5 N1 C1 119.66(16) . . ? 
C4 N1 C1 112.09(15) . . ? 
N1 C1 C12 112.37(15) . . ? 
N1 C1 C2 102.98(16) . . ? 
C12 C1 C2 112.60(16) . . ? 
N1 C1 H1 109.6 . . ? 
C12 C1 H1 109.6 . . ? 
C2 C1 H1 109.6 . . ? 
C3 C2 C1 103.98(17) . . ? 
C3 C2 H2A 111.0 . . ? 
C1 C2 H2A 111.0 . . ? 
C3 C2 H2B 111.0 . . ? 
C1 C2 H2B 111.0 . . ? 
H2A C2 H2B 109.0 . . ? 
C4 C3 C2 102.13(15) . . ? 
C4 C3 H3A 111.3 . . ? 
C2 C3 H3A 111.3 . . ? 
C4 C3 H3B 111.3 . . ? 
C2 C3 H3B 111.3 . . ? 
H3A C3 H3B 109.2 . . ? 
N1 C4 C3 102.84(19) . . ? 
N1 C4 H4A 111.2 . . ? 
C3 C4 H4A 111.2 . . ? 
N1 C4 H4B 111.2 . . ? 
C3 C4 H4B 111.2 . . ? 
H4A C4 H4B 109.1 . . ? 
O1 C5 N1 122.05(17) . . ? 
O1 C5 C6 120.70(17) . . ? 
N1 C5 C6 117.24(17) . . ? 
C7 C6 C11 119.77(17) . . ? 
C7 C6 C5 121.57(16) . . ? 
C11 C6 C5 118.60(16) . . ? 
C6 C7 C8 119.86(19) . . ? 
C6 C7 H7 120.1 . . ? 
C8 C7 H7 120.1 . . ? 
C9 C8 C7 119.63(19) . . ? 
C9 C8 H8 120.2 . . ? 
C7 C8 H8 120.2 . . ? 
C8 C9 C10 121.37(18) . . ? 
C8 C9 Br1 119.06(14) . . ? 
C10 C9 Br1 119.57(15) . . ? 
C9 C10 C11 118.85(18) . . ? 
C9 C10 H10 120.6 . . ? 
C11 C10 H10 120.6 . . ? 
C10 C11 C6 120.50(18) . . ? 
C10 C11 H11 119.7 . . ? 
C6 C11 H11 119.7 . . ? 
C17 C12 C13 119.48(17) . . ? 
C17 C12 C1 119.93(17) . . ? 
C13 C12 C1 120.50(17) . . ? 
C14 C13 C12 120.38(19) . . ? 
C14 C13 H13 119.8 . . ? 
C12 C13 H13 119.8 . . ? 
C13 C14 C15 119.37(18) . . ? 
C13 C14 H14 120.3 . . ? 
C15 C14 H14 120.3 . . ? 
C16 C15 C14 120.79(17) . . ? 
C16 C15 C18 118.96(17) . . ? 
C14 C15 C18 120.22(17) . . ? 
C17 C16 C15 118.90(17) . . ? 
C17 C16 H16 120.6 . . ? 
C15 C16 H16 120.6 . . ? 
C12 C17 C16 121.02(18) . . ? 
C12 C17 H17 119.5 . . ? 
C16 C17 H17 119.5 . . ? 
N2 C18 C15 176.6(2) . . ? 
H2C O2 H2D 105(2) . . ? 
 
_diffrn_measured_fraction_theta_max    1.000 
_diffrn_reflns_theta_full              28.32 
_diffrn_measured_fraction_theta_full   1.000 
_refine_diff_density_max    0.349 
_refine_diff_density_min   -0.447 
_refine_diff_density_rms    0.046 
